# Supplementary material for: Estimating flood discharge at river bridges using the entropy theory. Insights from Computational Fluid Dynamics flow fields
Source: Copernicus journal article supplement (doi:10.5194/hess-2023-253), 2023-12-14
Supplement: Supplementary file 1 [file hess-2023-253-supplement.pdf]

Supplementary Materials for:

## Estimating flood discharge at river bridges using the entropy theory. Insights from Computational Fluid Dynamics flow fields

Farhad Bahmanpouri<sup>1</sup>, Tommaso Lazzarin<sup>2</sup>, Silvia Barbetta<sup>1</sup>, Tommaso Moramarco<sup>1</sup>, Daniele P. Viero<sup>2</sup>

<sup>1</sup> Research Institute for Geo-Hydrological Protection, National Research Council (CNR), Perugia, 06128, Italy

<sup>2</sup> Department of Civil, Environmental and Architectural Engineering, University of Padova, 35131, Italy.

### S1. Results for the peak-flow condition of the 2012 flood event

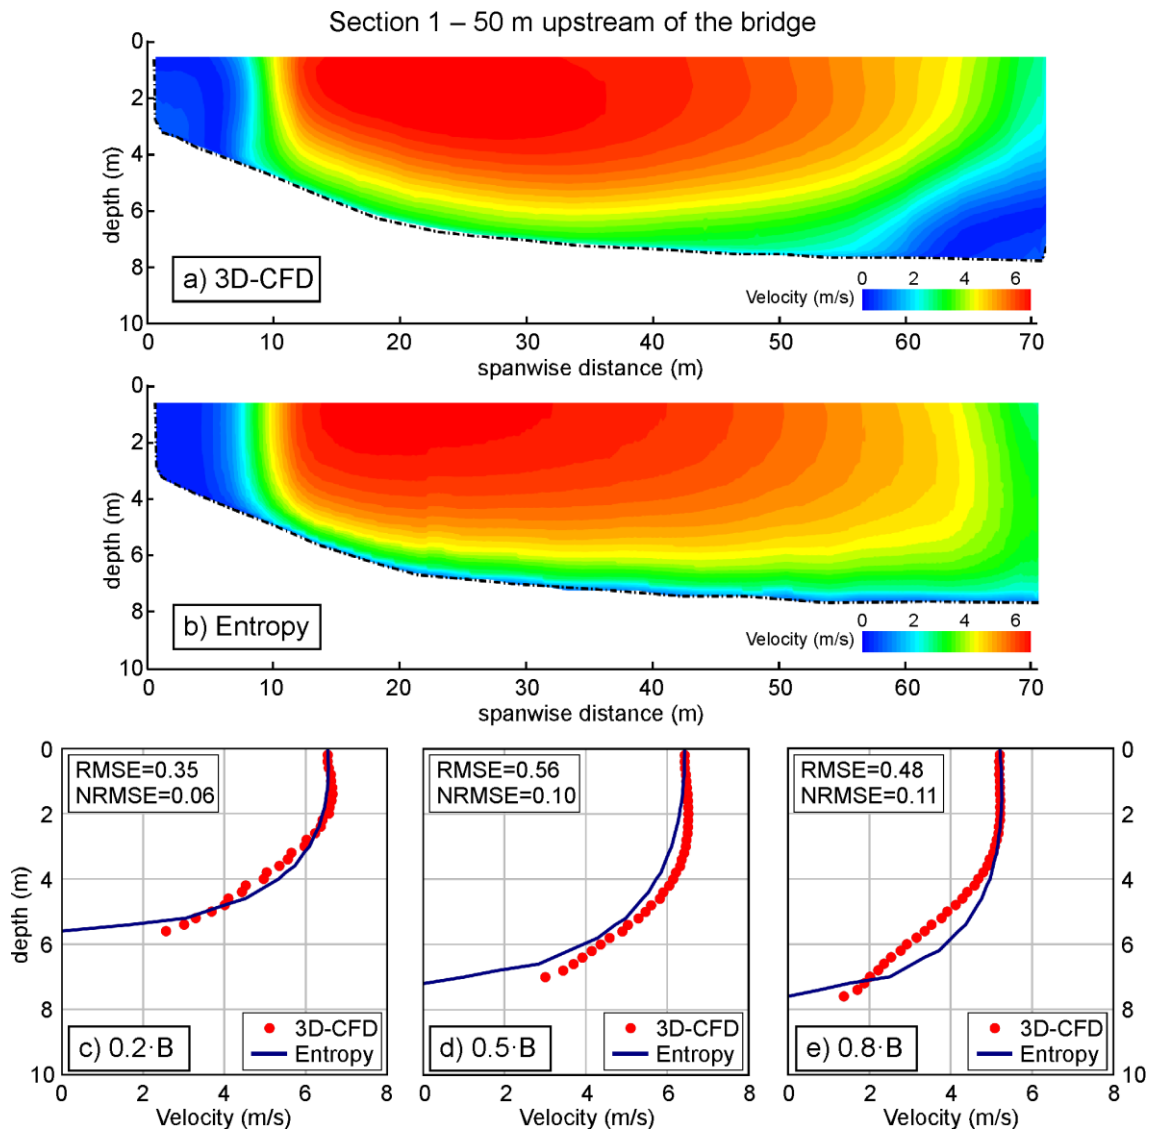

Figure S1. Flood event of 2012, cross-section 1 (50 m upstream of the bridge). Velocity distributions provided by (a) the 3D-CFD model, and (b) the entropy model forced with the river-wide distribution of the free-surface velocity. Comparison of vertical distributions of velocity at  $0.2B$  (c),  $0.5B$  (d), and  $0.8B$  (e), where  $B$  is the width of the cross-section.

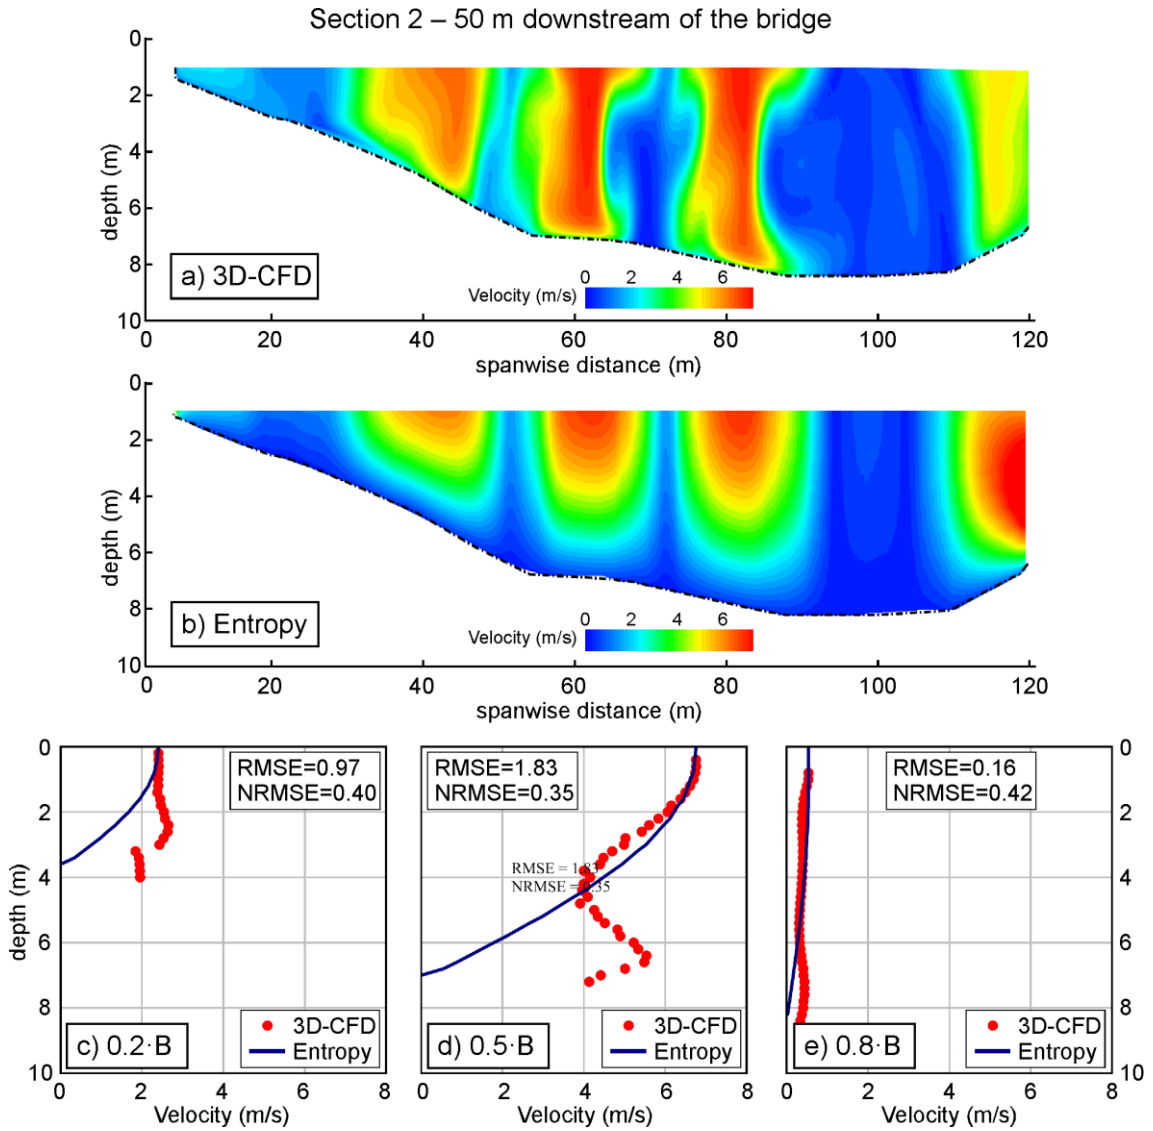

Figure S2. Flood event of 2012, cross-section 2 (50 m downstream of the bridge). Velocity distributions provided by (a) the 3D-CFD model, and (b) the entropy model forced with the river-wide distribution of the free-surface velocity. Comparison of vertical distributions of velocity at  $0.2B$  (c),  $0.5B$  (d), and  $0.8B$  (e), where  $B$  is the width of the cross-section.

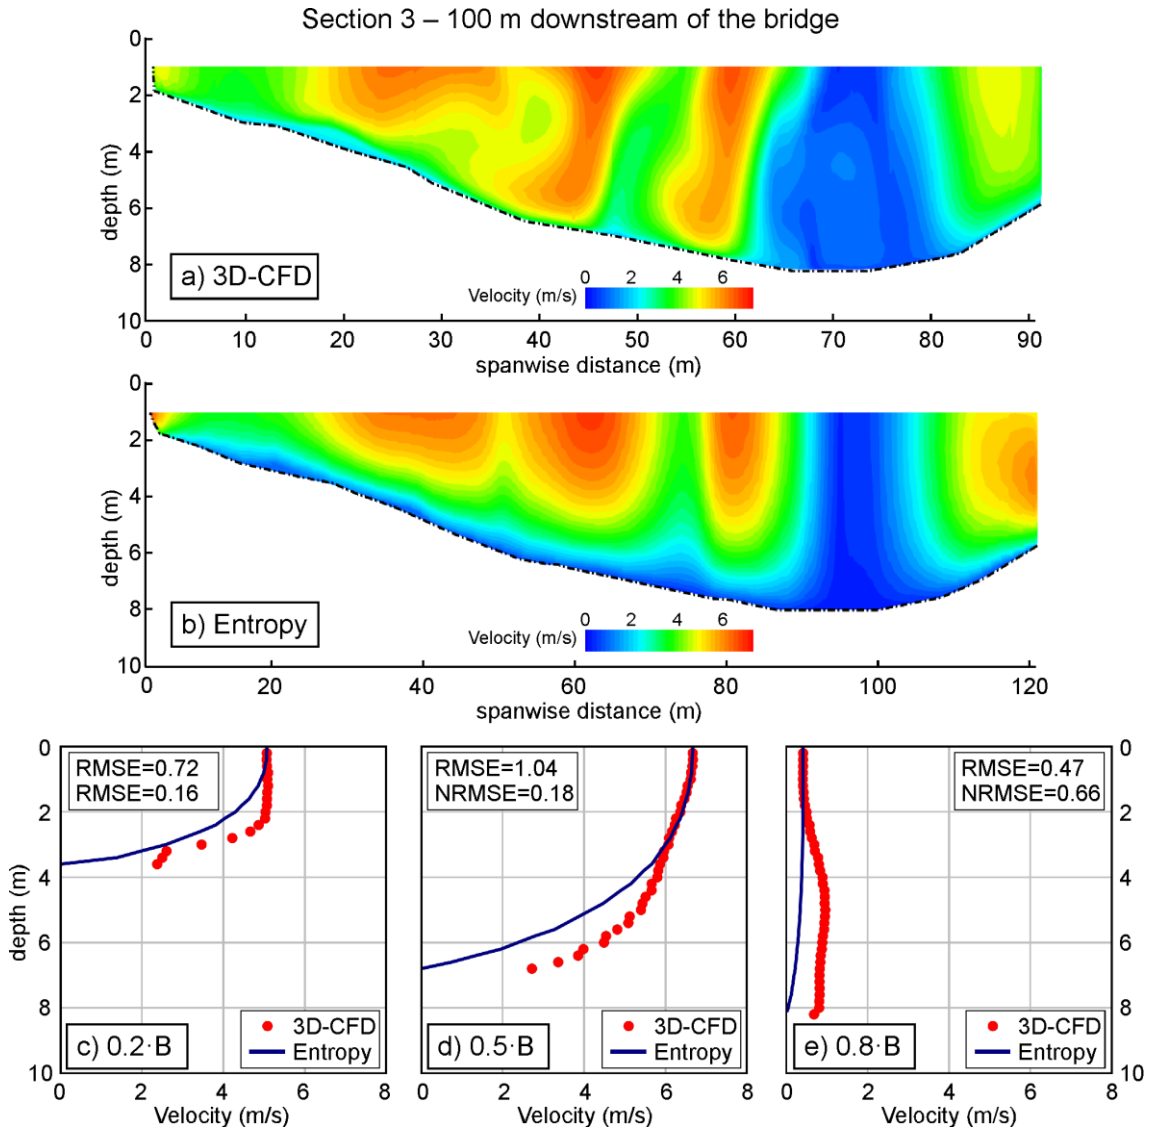

Figure S3. Flood event of 2012, cross-section 3 (100 m downstream of the bridge). Velocity distributions provided by (a) the 3D-CFD model, and (b) the entropy model forced with the river-wide distribution of the free-surface velocity. Comparison of vertical distributions of velocity at  $0.2B$  (c),  $0.5B$  (d), and  $0.8B$  (e), where  $B$  is the width of the cross-section.

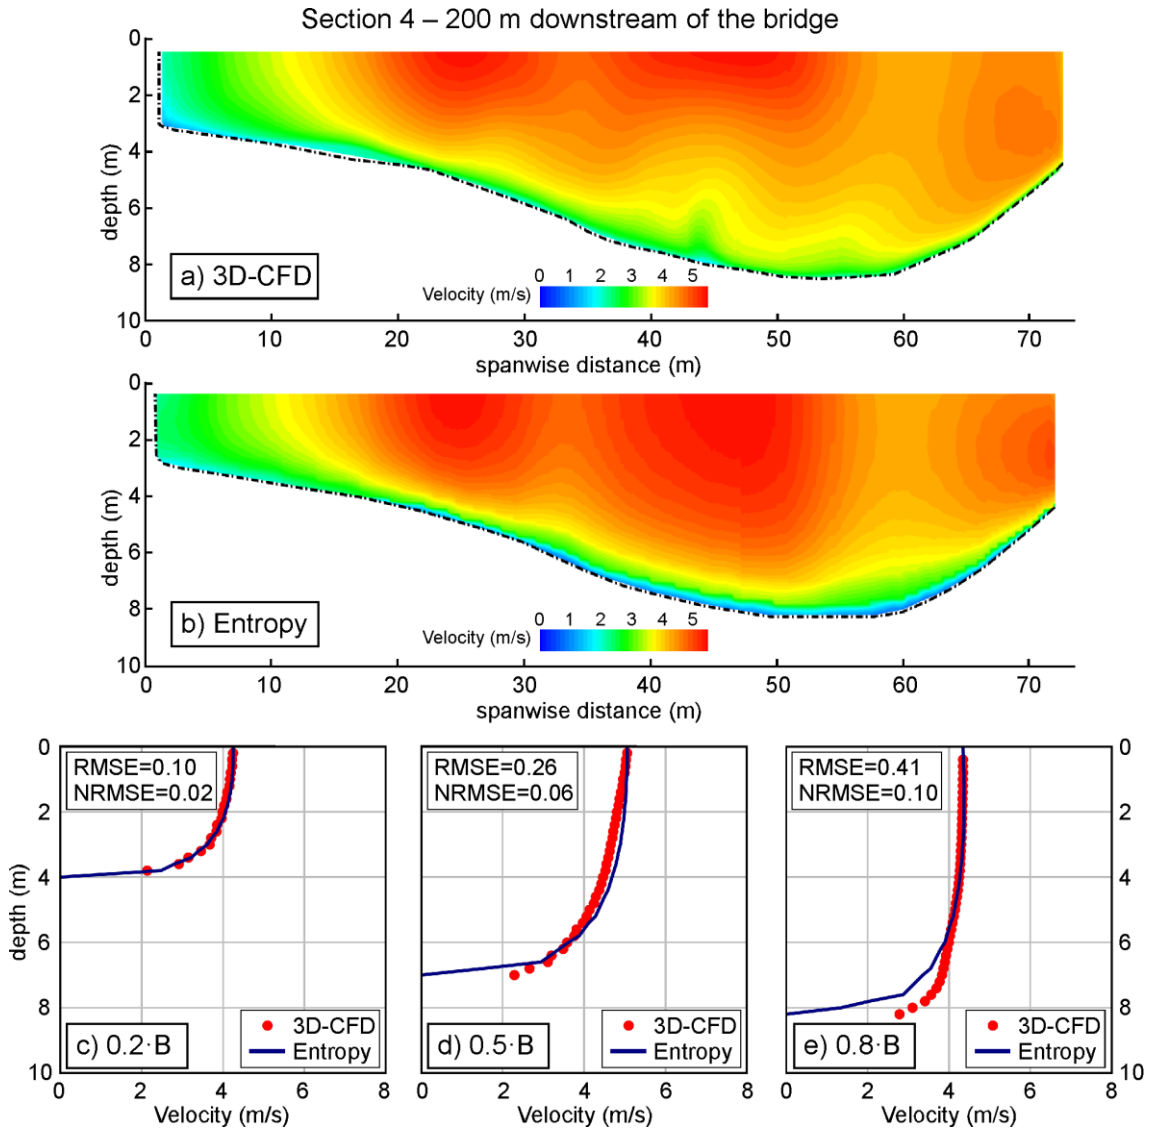

Figure S4. Flood event of 2012, cross-section 4 (200 m downstream of the bridge). Velocity distributions provided by (a) the 3D-CFD model, and (b) the entropy model forced with the river-wide distribution of the free-surface velocity. Comparison of vertical distributions of velocity at  $0.2B$  (c),  $0.5B$  (d), and  $0.8B$  (e), where  $B$  is the width of the cross-section.

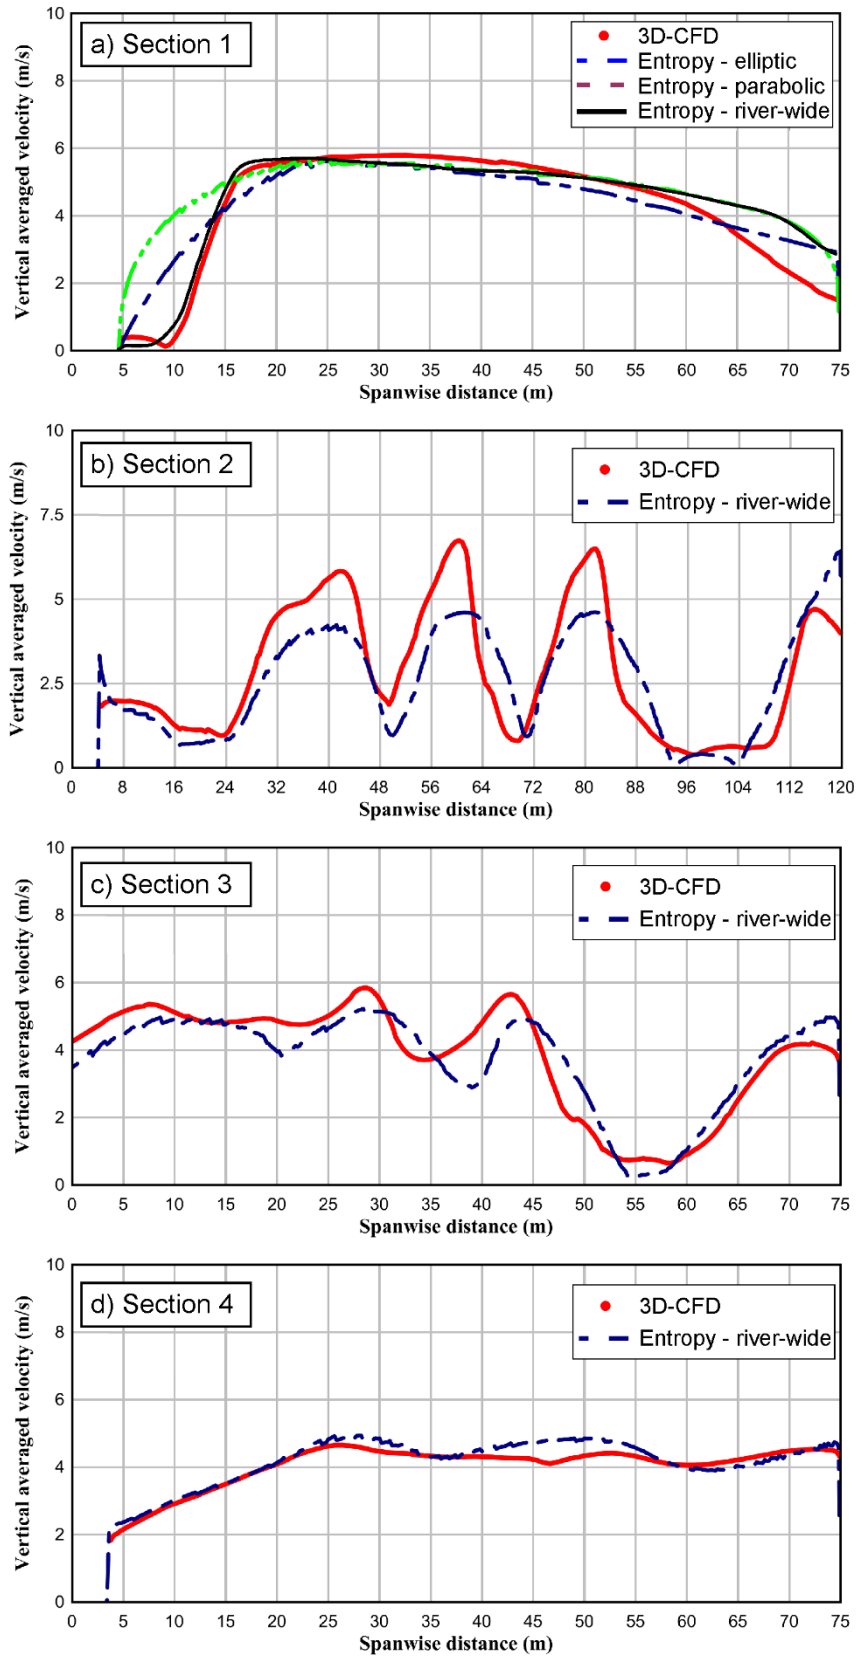

Figure S5. Flood event of 2012. Depth-averaged spanwise velocity distribution at the four cross-sections.

## S2. Results for the peak-flow condition of the 2019 flood event

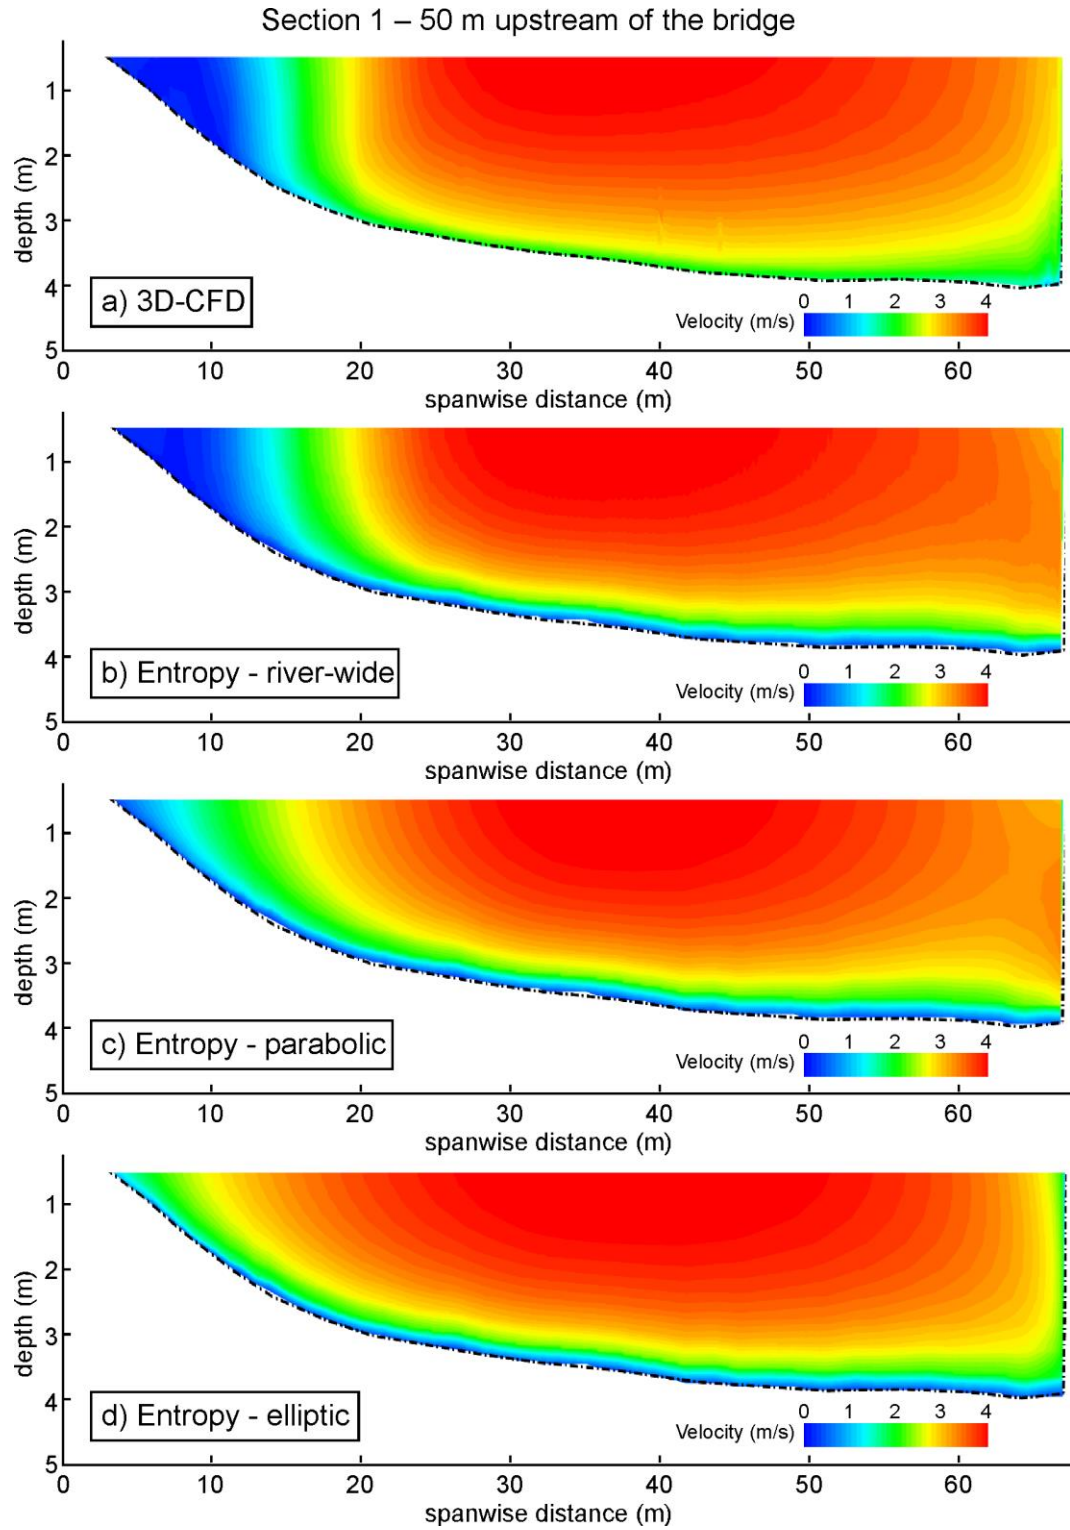

Figure S6. Flood event of 2019, cross-section 1 (50 m upstream of the bridge). Cross-sectional velocity distribution computed with the 3D-CFD model (a), and the entropy theory forced with (b) the river-wide surface velocity, (c) the parabolic, and (d) and elliptic spanwise velocity distribution.

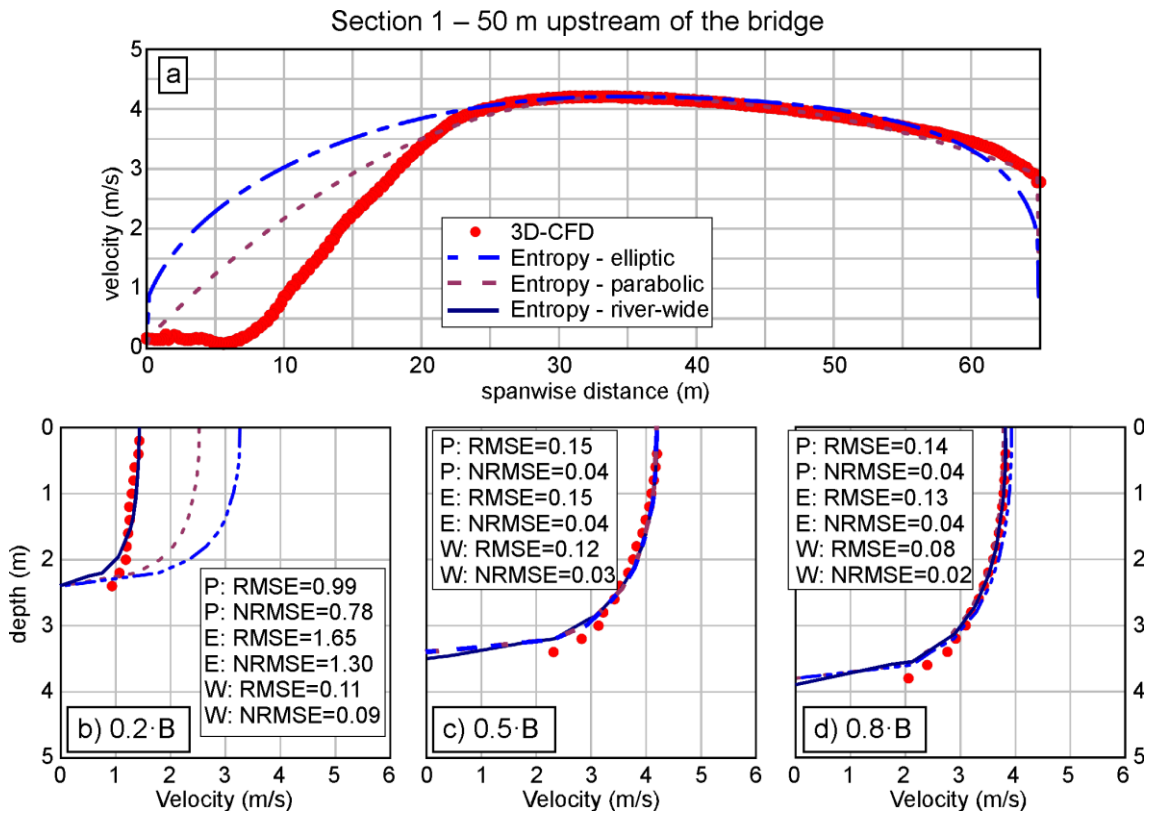

Figure S7. Flood event of 2019, cross-section 1 (50 m upstream of the bridge). Spanwise distribution of the surface velocity (a); comparison of vertical distributions of velocity at  $0.2B$  (b),  $0.5B$  (c), and  $0.8B$  (d).

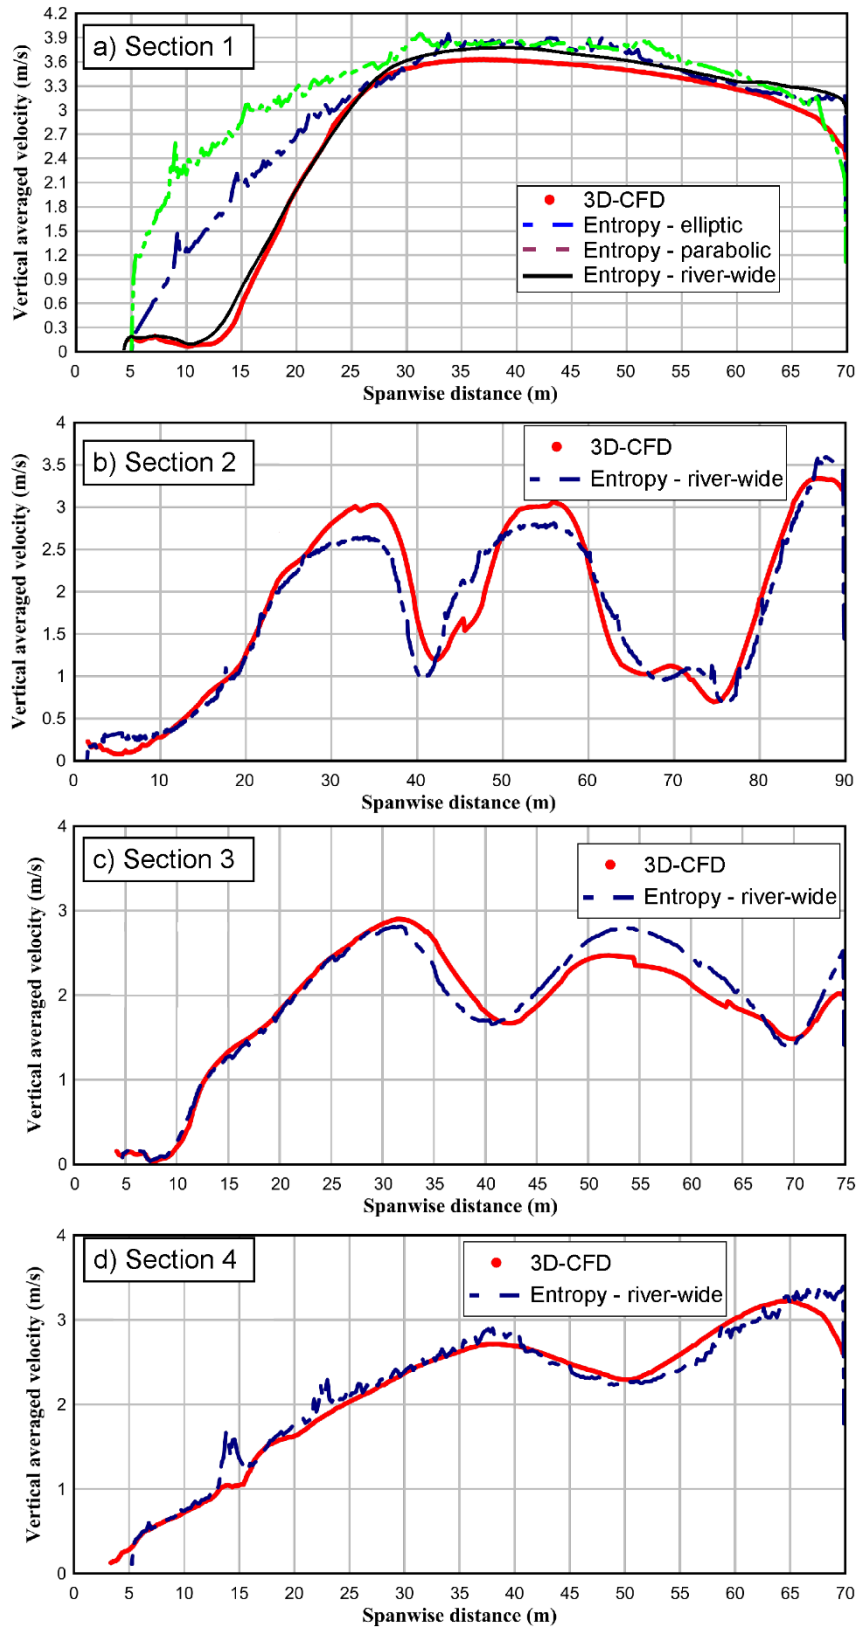

Figure S8. Flood event of 2019. Depth-averaged spanwise velocity distribution at the four cross-sections.



### S3. Results for the peak-flow condition of the 2022 flood event

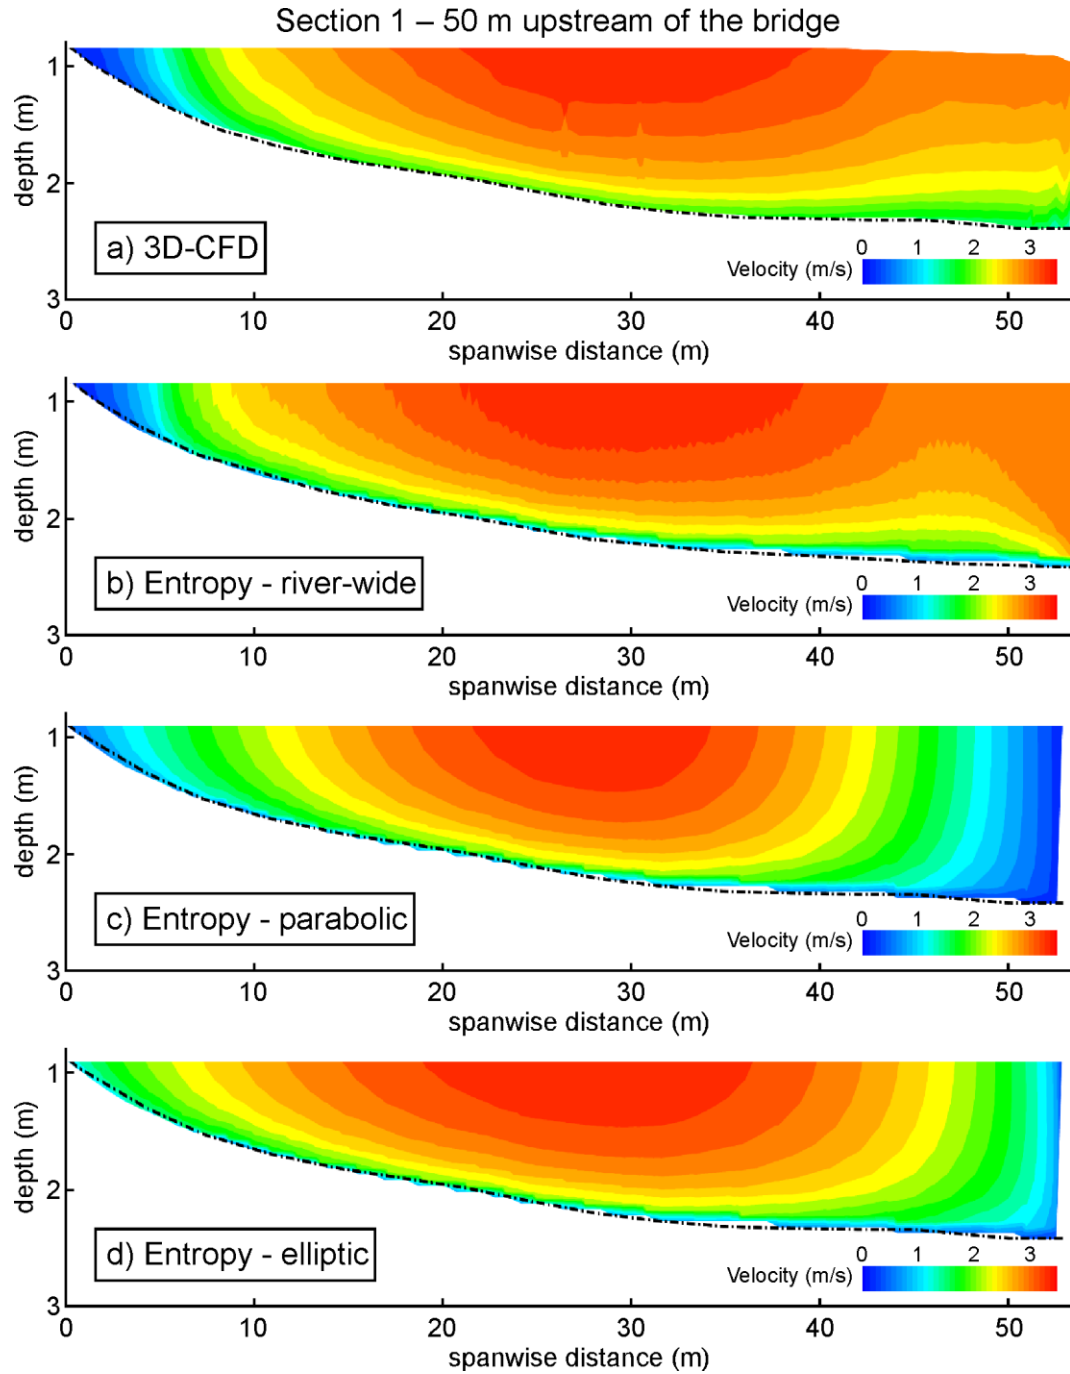

Figure S9. Flood event of 2022, cross-section 1 (50 m upstream of the bridge). Cross-sectional velocity distribution computed with the 3D-CFD model (a), and the entropy theory forced with (b) the river-wide surface velocity, (c) the parabolic, and (d) and elliptic spanwise velocity distribution.

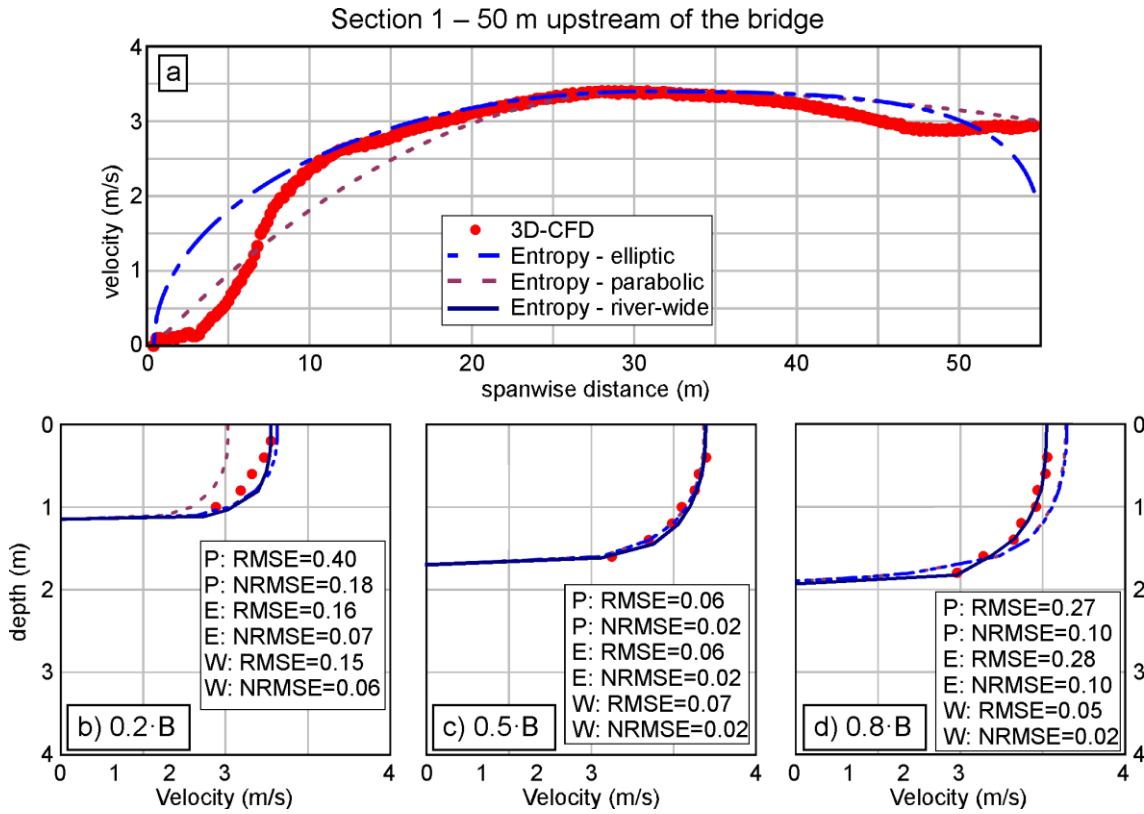

Figure S10. Flood event of 2022, cross-section 1 (50 m upstream of the bridge). Spanwise distribution of the surface velocity (a); comparison of vertical distributions of velocity at  $0.2B$  (b),  $0.5B$  (c), and  $0.8B$  (d).

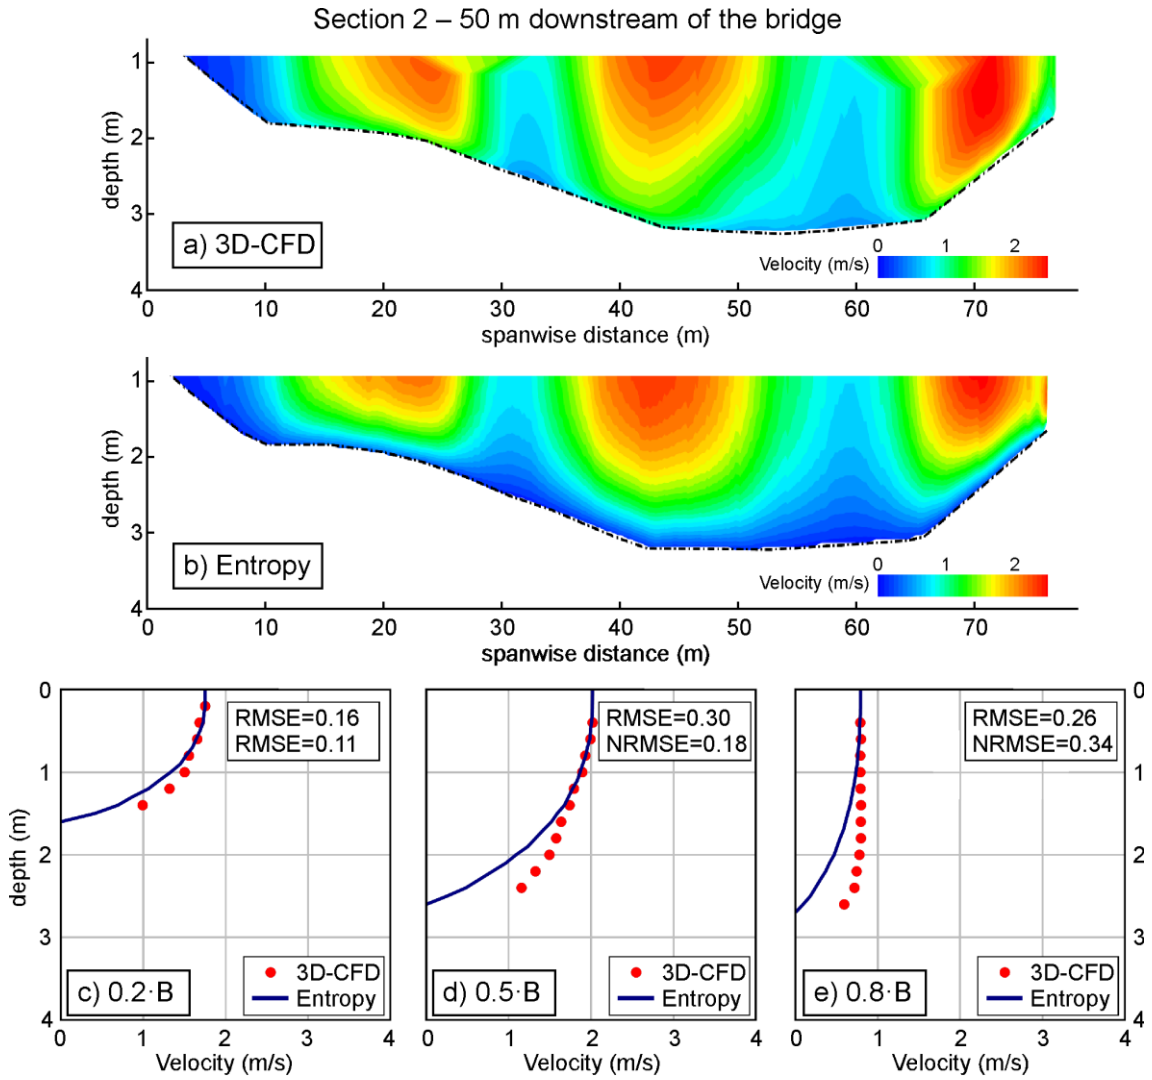

Figure S11. Flood event of 2022, cross-section 2 (50 m downstream of the bridge). Velocity distributions provided by (a) the 3D-CFD model, and (b) the entropy model forced with the river-wide distribution of the free-surface velocity. Comparison of vertical distributions of velocity at  $0.2B$  (c),  $0.5B$  (d), and  $0.8B$  (e), where  $B$  is the width of the cross-section.

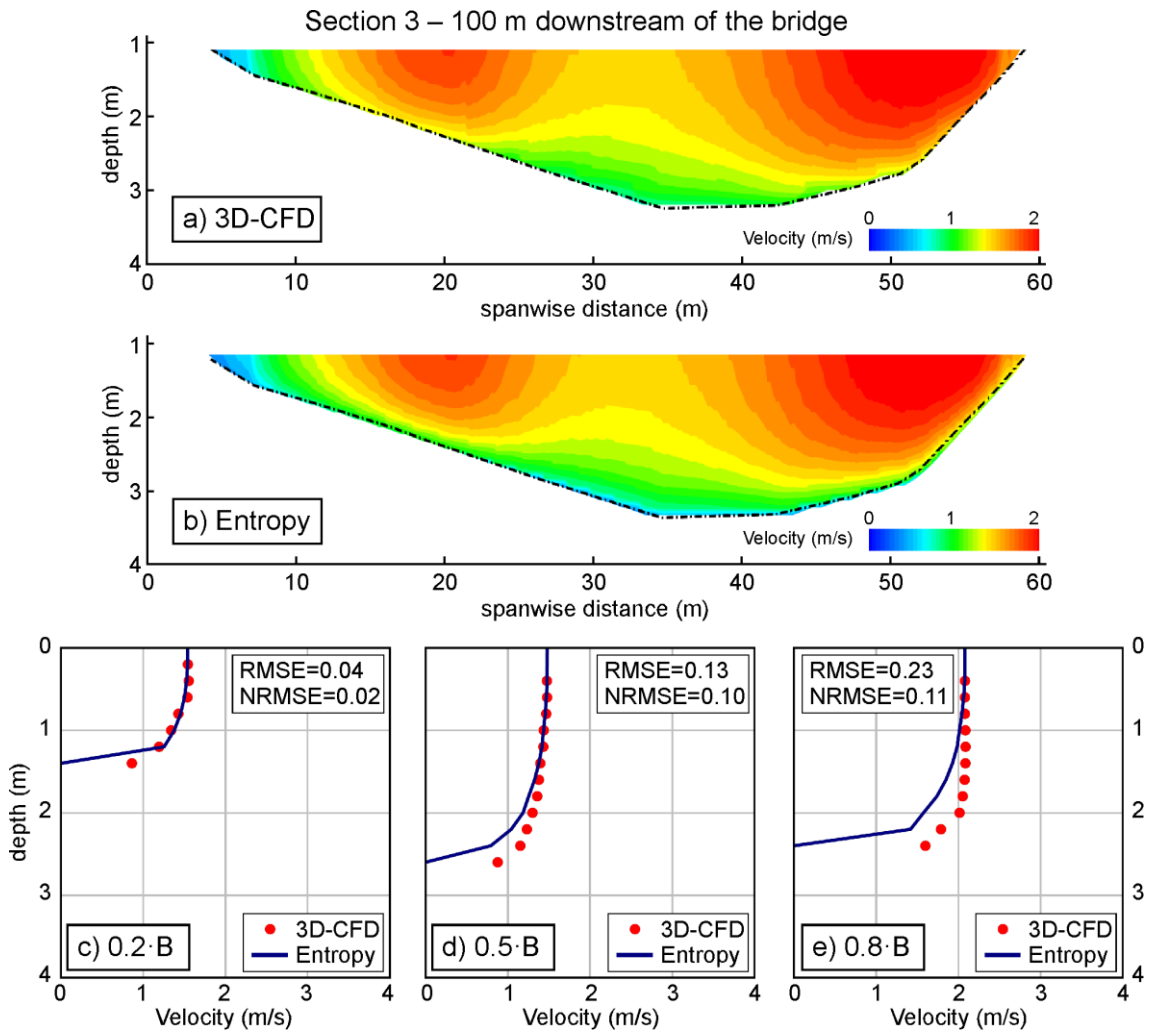

Figure S12. Flood event of 2022, cross-section 3 (100 m downstream of the bridge). Velocity distributions provided by (a) the 3D-CFD model, and (b) the entropy model forced with the river-wide distribution of the free-surface velocity. Comparison of vertical distributions of velocity at  $0.2B$  (c),  $0.5B$  (d), and  $0.8B$  (e), where  $B$  is the width of the cross-section.

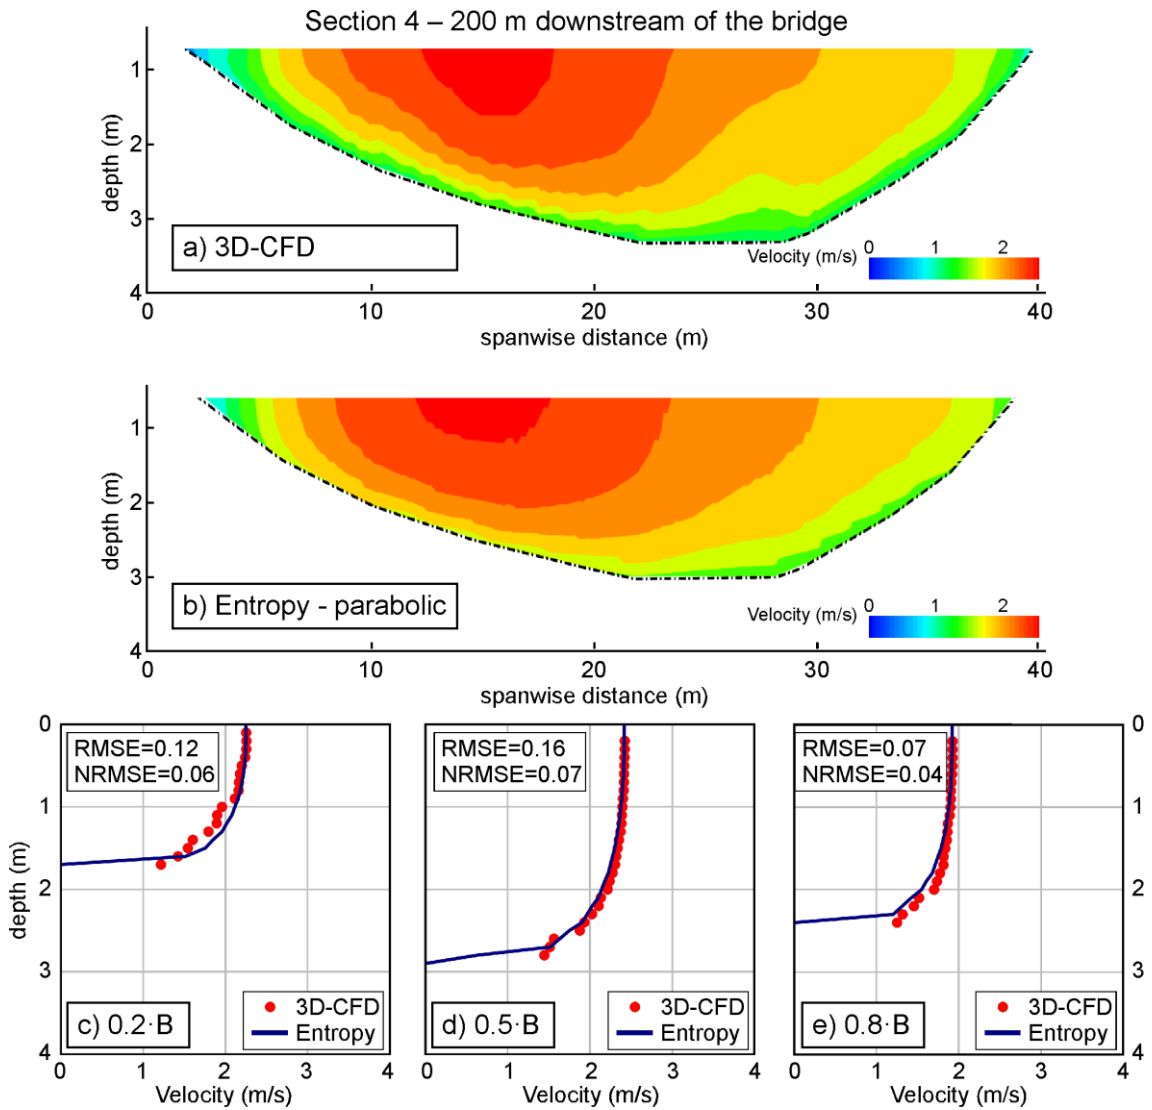

Figure S13. Flood event of 2022, cross-section 4 (200 m downstream of the bridge). Velocity distributions provided by (a) the 3D-CFD model, and (b) the entropy model forced with the river-wide distribution of the free-surface velocity. Comparison of vertical distributions of velocity at  $0.2B$  (c),  $0.5B$  (d), and  $0.8B$  (e), where  $B$  is the width of the cross-section.

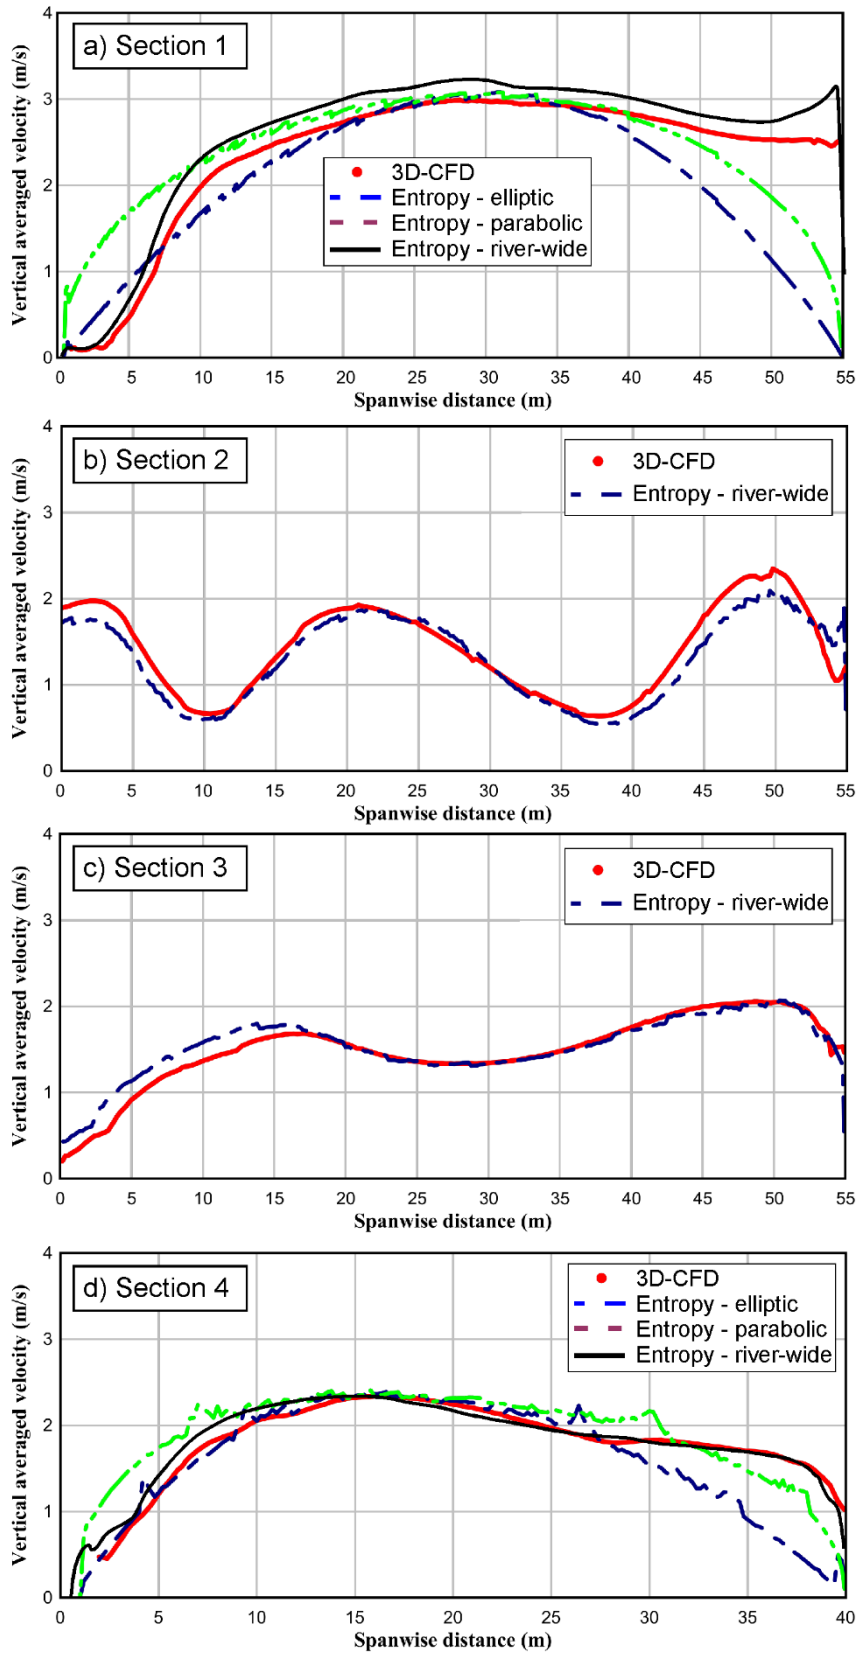

Figure S14. Flood event of 2019. Depth-averaged spanwise velocity distribution at the four cross-sections.
